# Supplementary material for: Plant metabolomics driven chemical and biological comparison of the root bark of Dictamnus dasycarpus and Dictamnus angustifolius
Source: Royal Society of Chemistry journal article supplement (doi:10.1039/c5ra00115c), 2015-01-01
Supplement: c5ra00115c1.pdf [file c5ra00115c1.pdf]

**Plant metabolomics driven chemical and biological comparison of the root bark  
of *Dictamnus dasycarpus* and *Dictamnus angustifolius***

Mengying Lv, <sup>a,b</sup> Yuan Tian, <sup>a,b</sup> Zunjian Zhang, <sup>a,b</sup> Jingyu Liang, <sup>c</sup> Fengguo Xu, <sup>\*a,b</sup> Jianbo Sun<sup>\*c</sup>

<sup>a</sup> *Key Laboratory of Drug Quality Control and Pharmacovigilance (Ministry of Education), China  
Pharmaceutical University, Nanjing 210009, China*

<sup>b</sup> *State Key Laboratory of Natural Medicine, China Pharmaceutical University, Nanjing 210009,  
China*

<sup>c</sup> *Department of Natural Medicinal Chemistry, China Pharmaceutical University, Nanjing 210009,  
China*

\*Corresponding author: **Fengguo Xu**

Key Laboratory of Drug Quality Control and Pharmacovigilance (Ministry of Education), China  
Pharmaceutical University, Nanjing 210009, China

Fax.: +86 25 8327 1021; Tel.: +86 25 8327 1021;

E-mail address: [fengguoxu@gmail.com](mailto:fengguoxu@gmail.com)

\*Corresponding author: **Jianbo Sun**

Department of Natural Medicinal Chemistry, China Pharmaceutical University, Nanjing 210009,  
China

Fax.: +86 25 8327 1415; Tel.: +86 25 8327 1415;

E-mail address: [sjbcpu@gmail.com](mailto:sjbcpu@gmail.com)

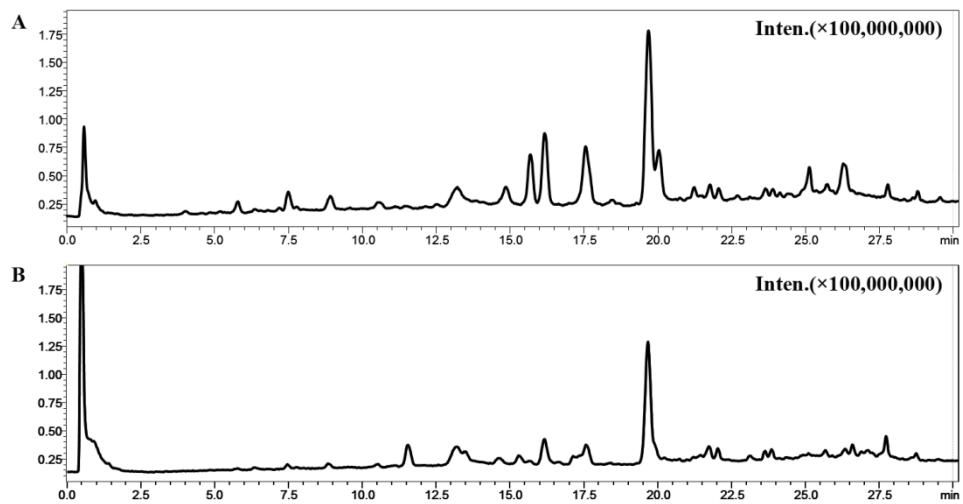

**Fig. S1** The total ion chromatograms of methanolic extracts of DD (A) and DA (B)
